# Supplementary material
Source: PubMed Central journal article supplement (PMC4447213)
Supplement: NIHMS679556-supplement-1.pdf [file NIHMS679556-supplement-1.pdf]

**A****DAVID Gene Ontology – Functional Annotation**

| <b><i>Biological Process</i></b>                   | <b><i>Count</i></b> | <b><i>P-value</i></b>  |
|----------------------------------------------------|---------------------|------------------------|
| Translation                                        | 76                  | 7.3x10 <sup>-67</sup>  |
| mRNA metabolic process                             | 20                  | 7.5x10 <sup>-7</sup>   |
| Protein folding                                    | 13                  | 1.4x10 <sup>-6</sup>   |
| RNA splicing                                       | 15                  | 7.1x10 <sup>-6</sup>   |
| mRNA processing                                    | 16                  | 3.5x10 <sup>-5</sup>   |
| Translation initiation                             | 7                   | 3.6x10 <sup>-5</sup>   |
| RNA processing                                     | 21                  | 4.5x10 <sup>-5</sup>   |
| Microtubule-based process                          | 14                  | 5.5x10 <sup>-5</sup>   |
| Protein localization                               | 29                  | 5.9x10 <sup>-5</sup>   |
| Regulation of protein complex disassembly          | 7                   | 7.4x10 <sup>-5</sup>   |
| <b><i>Cellular Components</i></b>                  |                     |                        |
| Cytosolic part                                     | 14                  | 5.2x10 <sup>-11</sup>  |
| Large ribosomal subunit                            | 10                  | 1.8x10 <sup>-8</sup>   |
| Melanosome                                         | 12                  | 2.7x10 <sup>-7</sup>   |
| Pigment granule                                    | 12                  | 2.7x 10 <sup>-7</sup>  |
| Cytosol                                            | 29                  | 3.9 x 10 <sup>-7</sup> |
| Cytosolic large ribosomal subunit                  | 5                   | 3.1x10 <sup>-6</sup>   |
| Eukaryotic translation initiation factor 3 complex | 5                   | 4.1x10 <sup>-5</sup>   |
| Microtubule                                        | 15                  | 8.9x10 <sup>-5</sup>   |
| Cytoskeletal part                                  | 30                  | 9.2x10 <sup>-5</sup>   |
| Cytosolic small ribosomal subunit                  | 4                   | 1.0x10 <sup>-4</sup>   |
| <b><i>Molecular Function</i></b>                   |                     |                        |
| Structural constituent of ribosome                 | 57                  | 6.0x10 <sup>-60</sup>  |
| Structural molecular activity                      | 70                  | 1.6x10 <sup>-45</sup>  |
| RNA binding                                        | 57                  | 8.4x10 <sup>-23</sup>  |
| Nucleotide binding                                 | 87                  | 1.2x10 <sup>-13</sup>  |
| Translation factor activity, nucleic acid binding  | 16                  | 2.1x10 <sup>-10</sup>  |
| Ribonucleotide binding                             | 66                  | 1.3x10 <sup>-8</sup>   |
| ATPase activity                                    | 22                  | 3.6x10 <sup>-8</sup>   |
| rRNA binding                                       | 8                   | 1.5x10 <sup>-7</sup>   |
| Unfolded protein binding                           | 11                  | 4.5x10 <sup>-7</sup>   |
| Translation initiation factor activity             | 10                  | 1.5x10 <sup>-6</sup>   |

**B**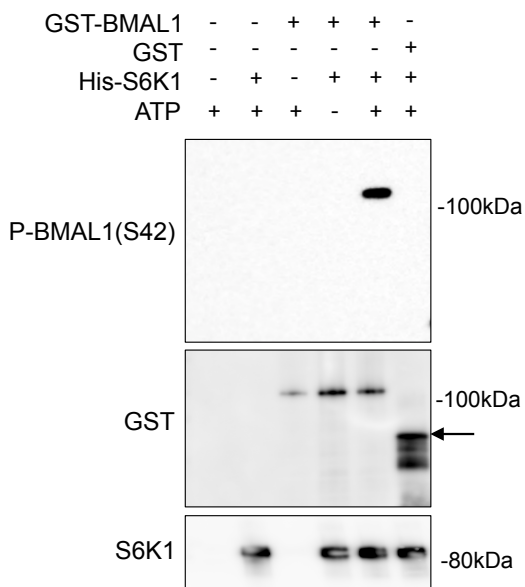**C**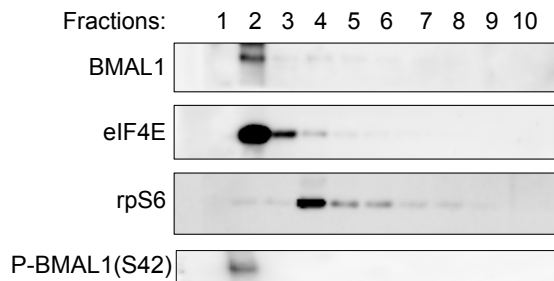

Figure S1
