# Supplementary material
Source: PubMed Central journal article supplement (PMC4447213)

pFR: -5'-Cap-*FFLuc*-IRES-*RLuc*-3'→

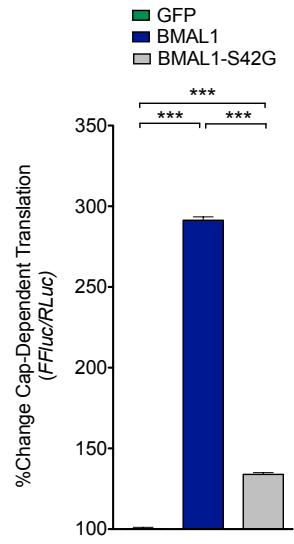

Figure S2

Supplement: NIHMS679556-supplement-2.pdf [file NIHMS679556-supplement-2.pdf]

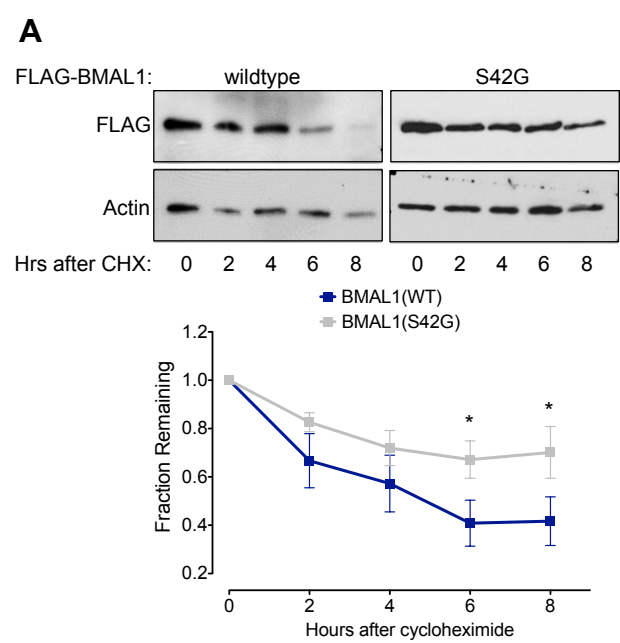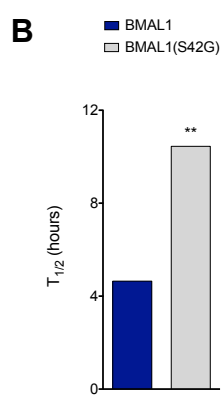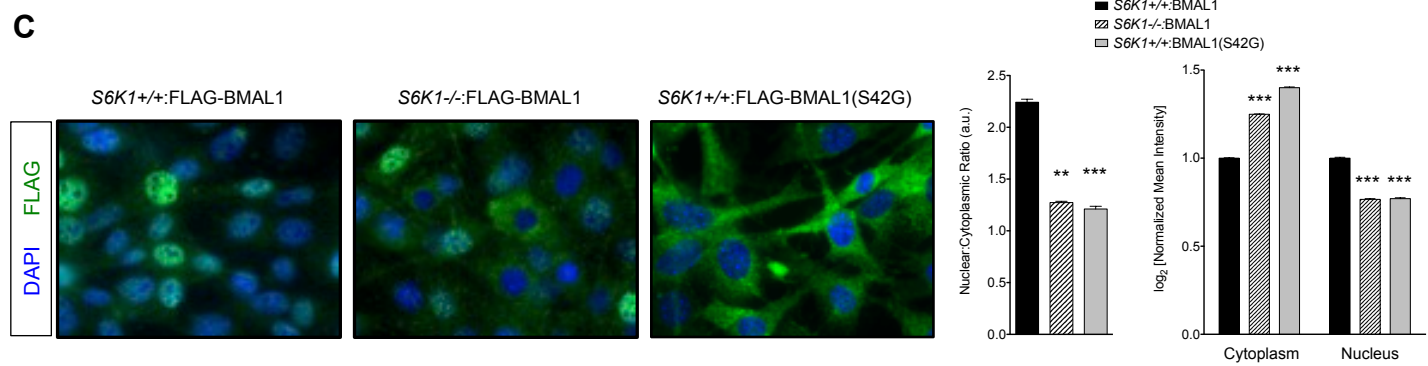

Figure S3

Supplement: NIHMS679556-supplement-3.pdf [file NIHMS679556-supplement-3.pdf]

**A**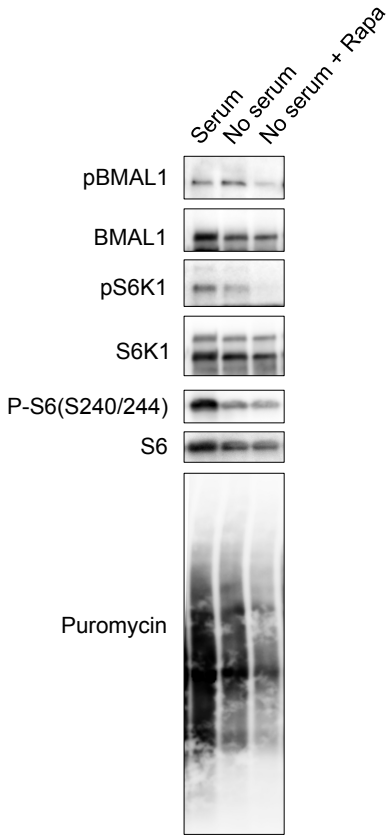**B**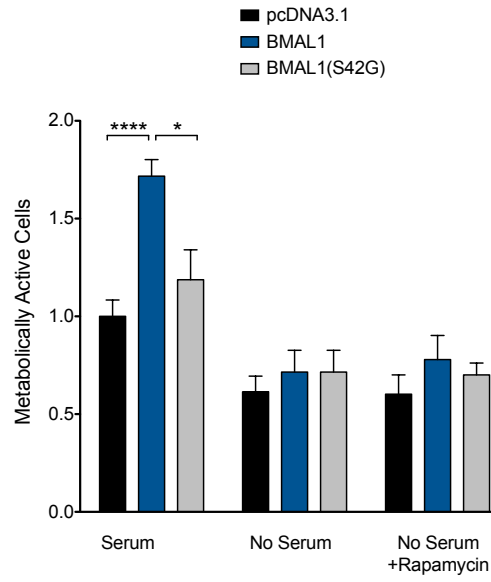

Figure S4.

Supplement: NIHMS679556-supplement-4.pdf [file NIHMS679556-supplement-4.pdf]

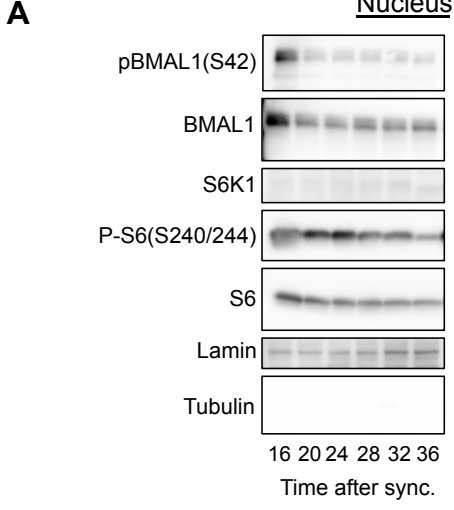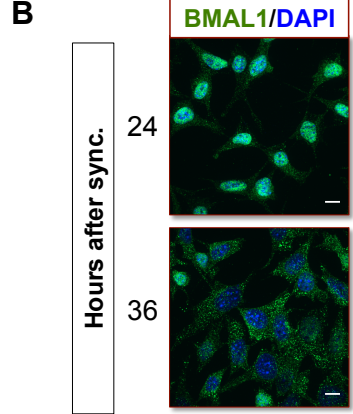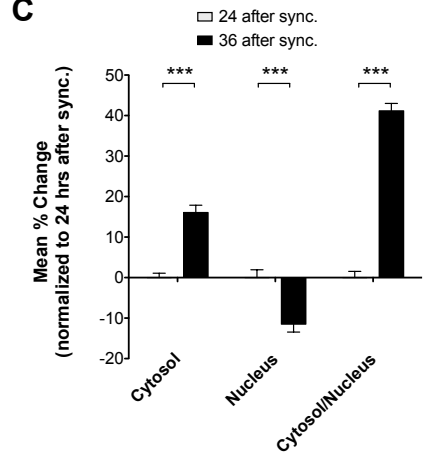

Figure S5

Supplement: NIHMS679556-supplement-5.pdf [file NIHMS679556-supplement-5.pdf]

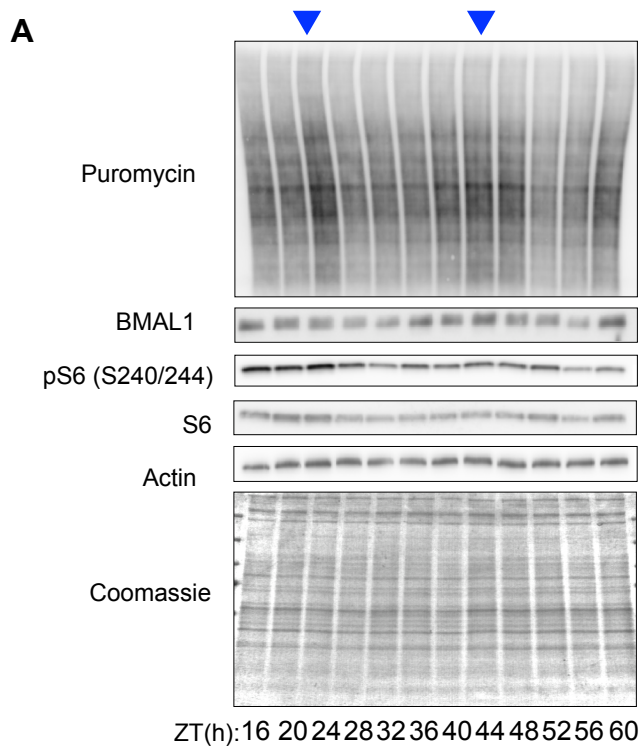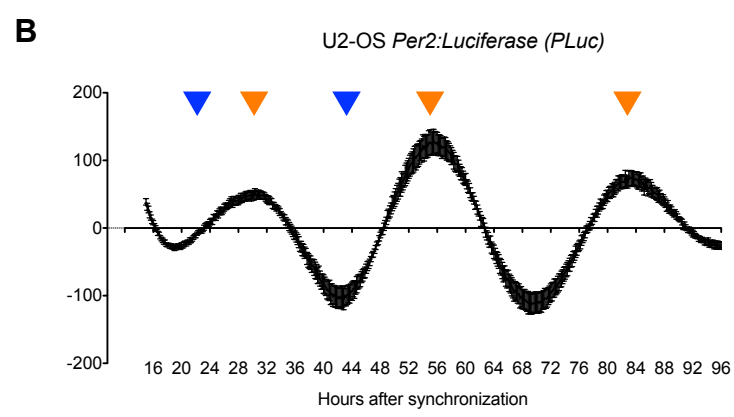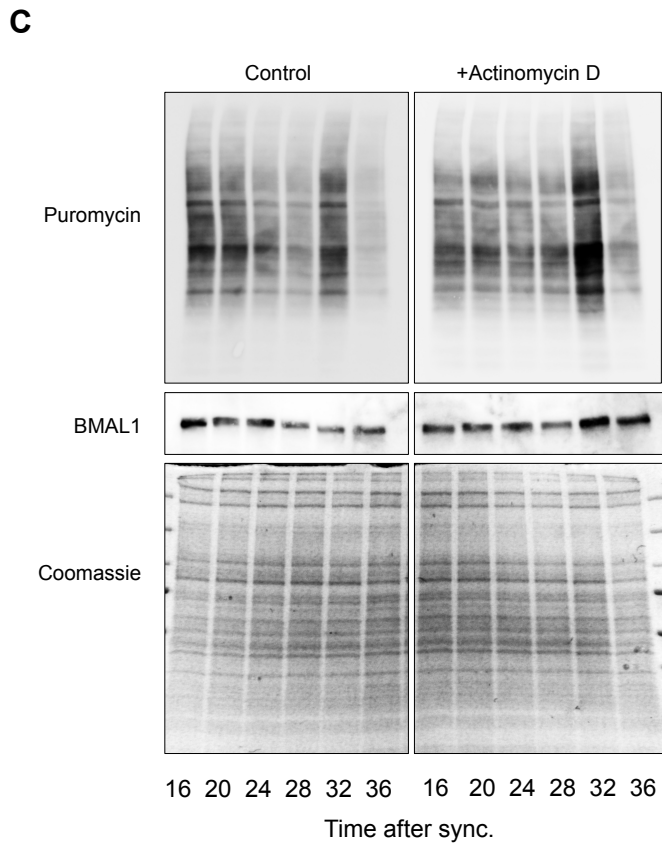

Figure S6

Supplement: NIHMS679556-supplement-6.pdf [file NIHMS679556-supplement-6.pdf]

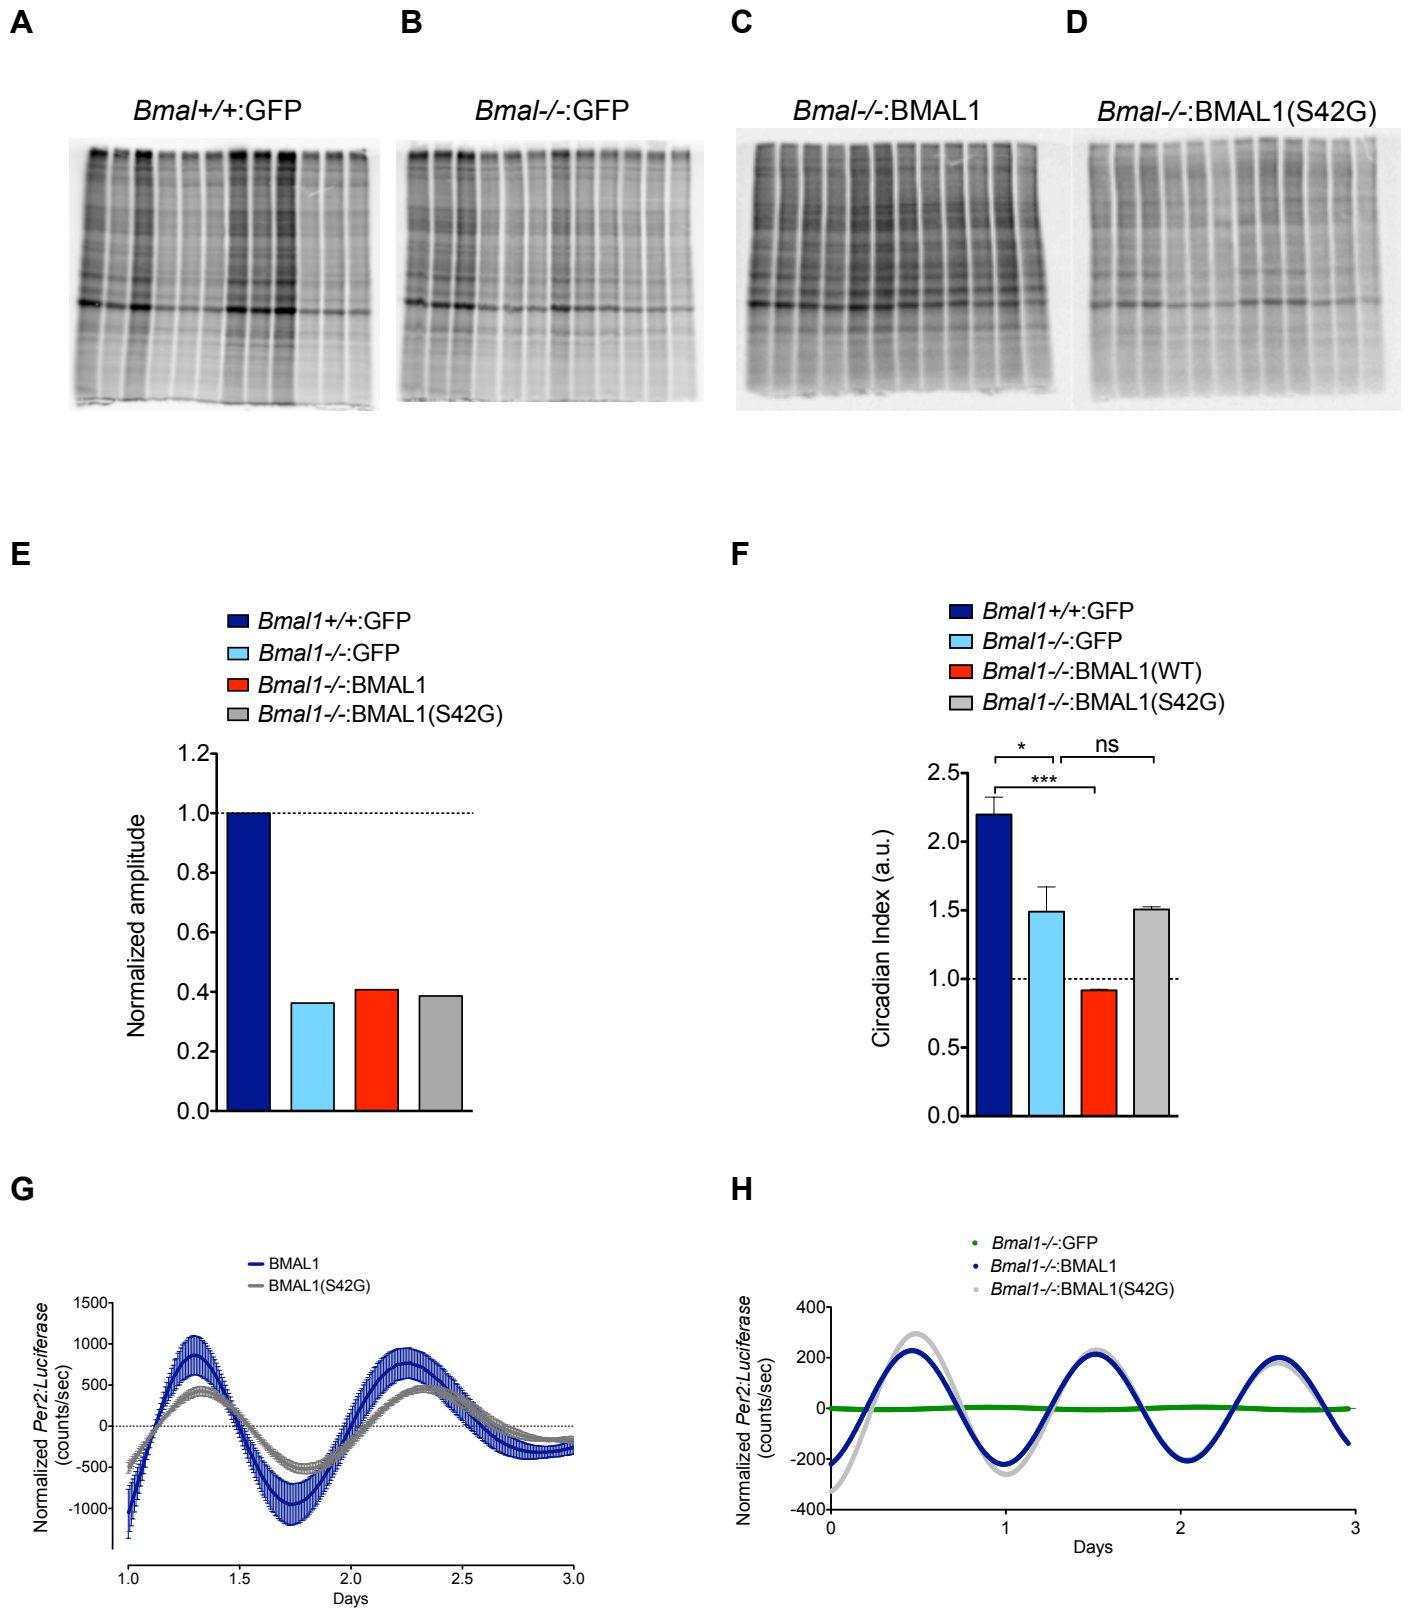

Figure S7

Supplement: NIHMS679556-supplement-7.pdf [file NIHMS679556-supplement-7.pdf]
